# Supplementary material for: Atrial Heterogeneity Generates Re-entrant Substrate during Atrial Fibrillation and Anti-arrhythmic Drug Action: Mechanistic Insights from Canine Atrial Models
Source: PubMed Central journal article supplement (PMC5161306; doi:10.1371/journal.pcbi.1005245), 2016-12-16
Supplement: pcbi.1005245.s015.pdf [file pcbi.1005245.s015.pdf]

| Conductance<br>(nS/pF) | PV       | LA       | RA       | BB - CT  | RNC      |
|------------------------|----------|----------|----------|----------|----------|
| gNa                    | 7.8      | 7.8      | 7.8      | 7.8      | 7.8      |
| gCaL                   | 0.255    | 0.34     | 0.34     | 0.58     | 0.24     |
| gCaP                   | 0.275    | 0.275    | 0.275    | 0.275    | 0.275    |
| gK1*                   | 0.036    | 0.1      | 0.1      | 0.1      | 0.15     |
| gto                    | 0.07104  | 0.096    | 0.096    | 0.096    | 0.19824  |
| gKur                   | 0.0115   | 0.0115   | 0.0115   | 0.0115   | 1        |
| gbCl                   | 0.0055   | 0.0008   | 0.0008   | 0.0008   | 0        |
| gKr*                   | 0.022475 | 0.0145   | 0.00899  | 0.00899  | 0.06984  |
| gKs                    | 0.0832   | 0.052    | 0.052    | 0.052    | 0.0561   |
| gbNa                   | 1.00E-05 | 1.00E-05 | 1.00E-05 | 1.00E-05 | 6.74E-04 |
| gbCa                   | 1.00E-05 | 1.00E-05 | 1.00E-05 | 1.00E-05 | 1.13E-03 |
| gNaCa                  | 1600     | 1600     | 1600     | 1600     | 1600     |
| gNaK                   | 0.6      | 0.6      | 0.6      | 0.6      | 0.6      |
| gKAch                  | 0.0065   | 0.0045   | 0.0045   | 0.0045   | 0        |

**Table S1:** Conductances of the currents used in each regional model. \*The formulation of these currents is also cell-type dependent - see the last chapter of S1 Supporting Text for details.
