# Supplementary material for: Atrial Heterogeneity Generates Re-entrant Substrate during Atrial Fibrillation and Anti-arrhythmic Drug Action: Mechanistic Insights from Canine Atrial Models
Source: PubMed Central journal article supplement (PMC5161306; doi:10.1371/journal.pcbi.1005245), 2016-12-16
Supplement: pcbi.1005245.s016.pdf [file pcbi.1005245.s016.pdf]

| Variable      | RNC Model            | RA, LA,<br>BB-CT, PV | Units   |
|---------------|----------------------|----------------------|---------|
| $k_{up}$      | $9.2 \times 10^{-4}$ | $6.0 \times 10^{-4}$ | $\mu M$ |
| $i_{up,max}$  | $5.0 \times 10^{-3}$ | $3.5 \times 10^{-3}$ | $mM/ms$ |
| $ca_{up,max}$ | 15.0                 | 27.0                 | $mM$    |
| $g_{rel}$     | 30.0                 | 8.0                  | $kHz$   |
| $\tau_u$      | 8.0                  | 11.2                 | $ms$    |

**Table S2:**  $Ca^{2+}$ -handling variables in the proposed family of models and the RNC model. Only parameters whose values differ in the two models are listed.
