# Supplementary material for: Atrial Heterogeneity Generates Re-entrant Substrate during Atrial Fibrillation and Anti-arrhythmic Drug Action: Mechanistic Insights from Canine Atrial Models
Source: PubMed Central journal article supplement (PMC5161306; doi:10.1371/journal.pcbi.1005245), 2016-12-16
Supplement: pcbi.1005245.s017.pdf [file pcbi.1005245.s017.pdf]

| Source of canine experimental data | Symbol in Figure 1a-c | Symbol in Figure 1d | AP data in Figure 3    |
|------------------------------------|-----------------------|---------------------|------------------------|
| Ehrlich et al, 2003 [1]            | ◇                     | △                   |                        |
| Li et al, 2001 [2]                 | O                     | □                   | LA (panel a)           |
| Cha et al, 2005 [3]                | □                     | X                   | LA, PV (panels a,b)    |
| Yue et al, 1997 [4]                | X                     | O                   |                        |
| Burashnikov et al, 2004 [5]        |                       | <                   | RA, BB-CT (panels c,d) |
| Chen et al, 2006 [6]               |                       | >                   |                        |

**Table S3:** Literature references for the canine experimental data shown in **Figures 1, 3** and **4** in the manuscript.

## References

- [1] Ehrlich, J.R., Cha, T.J., Zhang, L., Chartier, D., Melnyk, P., Hohnloser, S.H., Nattel, S.: Cellular electrophysiology of canine pulmonary vein cardiomyocytes: action potential and ionic current properties. *J. Physiol.* **551** (sep 2003) 801–13
- [2] Li, D.K.B., Zhang, L., Kneller, J., Nattel, S.: Potential Ionic Mechanism for Repolarization Differences Between Canine Right and Left Atrium. *Circ. Res.* **88**(11) (may 2001) 1168–1175
- [3] Cha, T.J., Ehrlich, J.R., Zhang, L., Chartier, D., Leung, T.K., Nattel, S.: Atrial tachycardia remodeling of pulmonary vein cardiomyocytes: comparison with left atrium and potential relation to arrhythmogenesis. *Circulation* **111**(6) (feb 2005) 728–35
- [4] Yue, L., Feng, J., Gaspo, R., Li, G.R., Wang, Z., Nattel, S.: Ionic Remodeling Underlying Action Potential Changes in a Canine Model of Atrial Fibrillation. *Circ. Res.* **81**(4) (oct 1997) 512–525
- [5] Burashnikov, A., Mannava, S., Antzelevitch, C.: Transmembrane action potential heterogeneity in the canine isolated arterially perfused right atrium: effect of IKr and IKur/Ito block. *Am. J. Physiol. Heart Circ. Physiol.* **286**(6) (jun 2004) H2393–400
- [6] Chen, Y.J., Chen, Y.C., Tai, C.T., Yeh, H.I., Lin, C.I., Chen, S.A.: Angiotensin II and angiotensin II receptor blocker modulate the arrhythmogenic activity of pulmonary veins. *Br. J. Pharmacol.* **147**(1) (jan 2006) 12–22
