# Supplementary material for: Atrial Heterogeneity Generates Re-entrant Substrate during Atrial Fibrillation and Anti-arrhythmic Drug Action: Mechanistic Insights from Canine Atrial Models
Source: PubMed Central journal article supplement (PMC5161306; doi:10.1371/journal.pcbi.1005245), 2016-12-16
Supplement: pcbi.1005245.s018.pdf [file pcbi.1005245.s018.pdf]

| Current    | Moderate Remodelling | Severe Remodelling | References |
|------------|----------------------|--------------------|------------|
| $I_{Na}$   | 0.90                 | 0.80               | [1]        |
| $I_{CaL}$  | 0.47                 | 0.31               | [2, 3]     |
| $I_{K1}$   | 1.80                 | 2.57               | [3]        |
| $I_{KAch}$ | 0.54                 | 0.38               | [4]        |
| $I_{to}$   | 1.64                 | 2.34               | [2, 3]     |
| $I_{NaCa}$ | 1.8                  | 2.57               | [5]        |

**Table S4:** Multiplicative factors for ionic remodelling of each current in conditions of moderate (7-days of RAP) and severe (42-days of RAP) remodelling, accompanied by the relevant references.

## References

- [1] Gaspo, R., Bosch, R.F., Bou-Abboud, E., Nattel, S.: Tachycardia-Induced Changes in Na<sup>+</sup> Current in a Chronic Dog Model of Atrial Fibrillation. *Circ. Res.* **81**(6) (dec 1997) 1045–1052
- [2] Yue, L., Feng, J., Gaspo, R., Li, G.R., Wang, Z., Nattel, S.: Ionic Remodeling Underlying Action Potential Changes in a Canine Model of Atrial Fibrillation. *Circ. Res.* **81**(4) (oct 1997) 512–525
- [3] Cha, T.J., Ehrlich, J.R., Zhang, L., Chartier, D., Leung, T.K., Nattel, S.: Atrial tachycardia remodeling of pulmonary vein cardiomyocytes: comparison with left atrium and potential relation to arrhythmogenesis. *Circulation* **111**(6) (feb 2005) 728–35
- [4] Voigt, N., Maguy, A., Yeh, Y., Qi, X.Y., Ravens, U., Dobrev, D., Nattel, S.: Changes in I<sub>K</sub>, ACh single-channel activity with atrial tachycardia remodelling in canine atrial cardiomyocytes. *Cardiovasc. Res.* **77**(1) (jan 2008) 35–43
- [5] Cha, T.J., Ehrlich, J.R., Zhang, L., Nattel, S.: Atrial ionic remodeling induced by atrial tachycardia in the presence of congestive heart failure. *Circulation* **110**(12) (sep 2004) 1520–6
