# Supplementary material for: Atrial Heterogeneity Generates Re-entrant Substrate during Atrial Fibrillation and Anti-arrhythmic Drug Action: Mechanistic Insights from Canine Atrial Models
Source: PubMed Central journal article supplement (PMC5161306; doi:10.1371/journal.pcbi.1005245), 2016-12-16
Supplement: pcbi.1005245.s023.pdf [file pcbi.1005245.s023.pdf]

| <b>Ionic Remodel.</b> | <b>Baseline</b>                                         | <b>Amio 10<br/>- <math>I_{K1}</math> block</b> | <b>Amio 10<br/>- <math>I_{CaL}</math> block</b> | <b>Verna 30<br/>+ <math>I_{K1}</math> block</b> | <b>Verna 30<br/>+ <math>I_{CaL}</math> block</b> |
|-----------------------|---------------------------------------------------------|------------------------------------------------|-------------------------------------------------|-------------------------------------------------|--------------------------------------------------|
| <b>Moderate</b>       | PV: 2 rotors<br>RA: wavelets                            | PV: 2 rotors<br>RA: 1 rotor                    | All activity terminated                         | PV: 1 rotor<br>RA: wavelets                     | PV: 1 rotor<br>RA: wavelets                      |
| <b>Severe</b>         | PV: 2 rotors<br>LA: 1 rotor<br>RA: 1 rotor,<br>wavelets | PV: 2 rotors<br>RA: 1 rotor,<br>wavelets       | All activity terminated                         | PV: 2 rotors<br>RA: wavelets                    | PV: 2 rotors<br>RA: 1 rotor                      |

**Figure S9:** Outcome of 3D simulations after administration of modified amiodarone 10 (Amio 10) and vernakalant 30 (Verna 30) drugs, in comparison to baseline (no drug) conditions. All simulations lasted 5 s. Blockade factors for additional  $I_{K1}$  and  $I_{CaL}$  blocks were 0.60.
