# Supplementary material for: Atrial Heterogeneity Generates Re-entrant Substrate during Atrial Fibrillation and Anti-arrhythmic Drug Action: Mechanistic Insights from Canine Atrial Models
Source: PubMed Central journal article supplement (PMC5161306; doi:10.1371/journal.pcbi.1005245), 2016-12-16
Supplement: pcbi.1005245.s024.pdf [file pcbi.1005245.s024.pdf]

|              | Amiodarone 10 | Amiodarone 10,<br>no $I_{K1}$ block | Amiodarone 10,<br>no $I_{CaL}$ block |
|--------------|---------------|-------------------------------------|--------------------------------------|
| ERP          | increased     | reduced                             | increased                            |
| $\Delta$ ERP | reduced       | reduced                             | reduced                              |
| 3D outcome   | good          | poor                                | good                                 |

|              | Vernakalant 30 | Vernakalant 30,<br>with $I_{K1}$ block | Vernakalant 30,<br>with $I_{CaL}$ block |
|--------------|----------------|----------------------------------------|-----------------------------------------|
| ERP          | increased      | increased                              | increased                               |
| $\Delta$ ERP | increased      | increased                              | increased                               |
| 3D outcome   | poor           | poor                                   | poor                                    |

**Table S10:** Summary of changes in effective refractory period (ERP) and dispersion of ERP between the LA and PV cells effected by analysed drug actions (shown in **Figure S12**), as well as the qualitative outcome of 3D simulations (**Table S9**) for the same drug actions.
